# Supplementary material
Source: Springer Nature journal article supplement (https://www.springermedizin.de/resource/supplementary/12885_2013_4227_MOESM4_ESM.pdf/9465848)
Supplement: MOESM4 [file 9465848]

---

| <b>Cause of death:</b> |                             |
|------------------------|-----------------------------|
| Case 1                 | heart failure               |
| Case 2                 | heart failure               |
| Case 3                 | aspiration pneumonia        |
| Case 4                 | liver failure               |
| Case 5                 | Unknown (no autopsy)        |
| Case 6                 | heart failure               |
| Case 7                 | myocardial infarction       |
| Case 8                 | protracted shock            |
| Case 9                 | ischemia of the small bowel |

---

**Table 1:**
